# Supplementary material
Source: publisher site journal article supplement (https://www.dovepress.com/article/323591)
Supplement: Supplementary file 1 [file get_supplementary_file.php]

**Table S2**. GO and KEGG analyses of KIF1A co-expression genes.

| **Category** | **Term** | **Count** | **%** | **P Value** |
| --- | --- | --- | --- | --- |
| GOTERM_BP_DIRECT | GO:0043044~ATP-dependent chromatin remodeling | 13 | 0.44353463 | 2.50E-05 |
| GOTERM_BP_DIRECT | GO:0006351~transcription, DNA-templated | 346 | 11.80484476 | 3.31E-05 |
| GOTERM_BP_DIRECT | GO:0019835~cytolysis | 12 | 0.409416581 | 5.24E-05 |
| GOTERM_BP_DIRECT | GO:0042102~positive regulation of T cell proliferation | 22 | 0.750597066 | 6.35E-05 |
| GOTERM_BP_DIRECT | GO:0045893~positive regulation of transcription, DNA-templated | 108 | 3.684749232 | 6.78E-05 |
| GOTERM_BP_DIRECT | GO:0016569~covalent chromatin modification | 33 | 1.125895599 | 1.14E-04 |
| GOTERM_BP_DIRECT | GO:0031295~T cell costimulation | 25 | 0.852951211 | 2.01E-04 |
| GOTERM_BP_DIRECT | GO:0032729~positive regulation of interferon-gamma production | 17 | 0.580006824 | 5.01E-04 |
| GOTERM_BP_DIRECT | GO:0030325~adrenal gland development | 10 | 0.341180484 | 6.71E-04 |
| GOTERM_BP_DIRECT | GO:0030111~regulation of Wnt signaling pathway | 10 | 0.341180484 | 6.71E-04 |
| GOTERM_CC_DIRECT | GO:0005887~integral component of plasma membrane | 258 | 8.802456499 | 2.06E-05 |
| GOTERM_CC_DIRECT | GO:0016581~NuRD complex | 10 | 0.341180484 | 3.62E-04 |
| GOTERM_CC_DIRECT | GO:0005737~cytoplasm | 819 | 27.94268168 | 8.05E-04 |
| GOTERM_CC_DIRECT | GO:0045202~synapse | 43 | 1.467076083 | 9.29E-04 |
| GOTERM_CC_DIRECT | GO:0030054~cell junction | 91 | 3.104742409 | 1.07E-03 |
| GOTERM_CC_DIRECT | GO:0071556~integral component of lumenal side of endoplasmic reticulum membrane | 12 | 0.409416581 | 1.48E-03 |
| GOTERM_CC_DIRECT | GO:0032993~protein-DNA complex | 11 | 0.375298533 | 1.51E-03 |
| GOTERM_CC_DIRECT | GO:0071565~nBAF complex | 8 | 0.272944388 | 1.69E-03 |
| GOTERM_CC_DIRECT | GO:0042613~MHC class II protein complex | 10 | 0.341180484 | 2.16E-03 |
| GOTERM_CC_DIRECT | GO:0014069~postsynaptic density | 42 | 1.432958035 | 2.39E-03 |
| GOTERM_MF_DIRECT | GO:0005515~protein binding | 1351 | 46.09348345 | 1.36E-04 |
| GOTERM_MF_DIRECT | GO:0003682~chromatin binding | 83 | 2.831798021 | 2.46E-04 |
| GOTERM_MF_DIRECT | GO:0000980~RNA polymerase II distal enhancer sequence-specific DNA binding | 21 | 0.716479017 | 5.79E-04 |
| GOTERM_MF_DIRECT | GO:0003677~DNA binding | 286 | 9.757761856 | 9.51E-04 |
| GOTERM_MF_DIRECT | GO:0019864~IgG binding | 7 | 0.238826339 | 2.15E-03 |
| GOTERM_MF_DIRECT | GO:0018024~histone-lysine N-methyltransferase activity | 14 | 0.477652678 | 2.33E-03 |
| GOTERM_MF_DIRECT | GO:0032395~MHC class II receptor activity | 8 | 0.272944388 | 2.85E-03 |
| GOTERM_MF_DIRECT | GO:0032452~histone demethylase activity | 10 | 0.341180484 | 3.19E-03 |
| GOTERM_MF_DIRECT | GO:0004896~cytokine receptor activity | 13 | 0.44353463 | 3.39E-03 |
| GOTERM_MF_DIRECT | GO:0004872~receptor activity | 47 | 1.603548277 | 4.13E-03 |
| KEGG_PATHWAY | hsa05016: Huntington's disease | 54 | 1.842374616 | 1.73E-06 |
| KEGG_PATHWAY | hsa05416: Viral myocarditis | 24 | 0.818833163 | 1.82E-06 |
| KEGG_PATHWAY | hsa04145: Phagosome | 45 | 1.53531218 | 2.31E-06 |
| KEGG_PATHWAY | hsa05150: Staphylococcus aureus infection | 23 | 0.784715114 | 2.52E-06 |
| KEGG_PATHWAY | hsa05330: Allograft rejection | 18 | 0.614124872 | 4.98E-06 |
| KEGG_PATHWAY | hsa04940: Type I diabetes mellitus | 19 | 0.648242921 | 8.86E-06 |
| KEGG_PATHWAY | hsa05332: Graft-versus-host disease | 16 | 0.545888775 | 2.12E-05 |
| KEGG_PATHWAY | hsa04612: Antigen processing and presentation | 26 | 0.88706926 | 4.47E-05 |
| KEGG_PATHWAY | hsa05152: Tuberculosis | 45 | 1.53531218 | 1.98E-04 |
| KEGG_PATHWAY | hsa04514: Cell adhesion molecules (CAMs) | 38 | 1.296485841 | 2.31E-04 |
